# Supplementary material
Source: Research Square preprint supplement (doi:10.21203/rs.3.rs-9202407/v1)
Supplement: Supplementary file 1 [file 7f5cdff69d204495855ead15.docx]

**TABLES**

Table 1: Demographic, ocular characteristics and outcome measurements according to etiological groups

|  | Papilledema | Pseudopapilledema | Inflammatory | Controls |
| --- | --- | --- | --- | --- |
| Patients | n=9 | n=22 | n=7 | n=11 |
| age, years (SD) | 10.7 (3.9) | 10.6 (3.6) | 12 (2.7) | 7.3 (2.5) |
| sex, female (%) | 3 (33.3) | 15 (68.2) | 3 (42.9) | 3 (27.3) |
| bilateral | 9 (100) | 19 (86.4) | 4 (57.1) | 11 (100) |
| Eyes | n=16 | n=39 | n=11 | n=19 |
| right side (%) | 8 (50) | 18 (46.2) | 6 (54.5) | 9 (47.4) |
| mean VA, logMAR (SD) | 0.03 (0.07) | 0.01 (0.4) | -0.2 (0.4) | -0.02 (0.07) |
| mean spherical equivalent, δ (SD) | 0.9 (1) | 1.2 (2.5) | -0.1 (1.2) | 0.6 (1.4) |
| Frisén score (%)  1  2  3  4  not applicable (healthy) | 11 (68.8)  1 (6.2)  3 (18.8)  1 (6.2)  0 (0.0) | 15 (38.5)  23 (59)  1 (2.6)  0 (0)  0 (0.0) | 8 (72.7)  1 (9.1)  2 (18.2)  0 (0)  0 (0) | 0 (0)  0 (0)  0 (0)  0 (0)  19 (100) |
| mean SNR, dB (SD) | 49.6 (6.8) | 50 (4.3) | 42.1 (6) | 51 (5.2) |
| mean RNFL thickness, µm (SD) | 190.3 (72) | 145.4 (53.7) | 147.6 (38.2) | 103.8 (8.2) |
| mean CGL thickness, µm (SD) | 68.9 (2.7) | 68 (3.7) | 74.5 (5.9) | 67.7 (5.4) |
| mean disc area, mm2 (SD) | 2.4 (0.5) | 2.4 (0.5) | 1.9 (0.3) | 2.2 (0.4) |
| RPC mean  vascular density, % (SD) | **41.6 (3.8)** | **43.9 (3.1)** | **44.7 (5.1)** | **44.9 (2.8)** |
| SD: standard deviation, VA: visual acuity, SNR: signal noise ratio, RNFL: retinal nerve fiber layer, CGL: cell ganglion layer, RPC: retinal peripapillary capillary network | | | | |

Table 2: Retinal peripapillary capillary network vascular density association with the other outcomes collected

|  | n | RPC VD mean difference, % (CI 95%) | p value |
| --- | --- | --- | --- |
| Age, per 1-year increase | 85 | -0.01 (-0.2 to 0.2) | 1 |
| Sex, female versus male | 85 | -0.7 (-2.4 to 1.1) | 0.5 |
| RNFL thickness, per 1 µm increase | 82 | -0.02 (-0.03 to -0.01) | <0.01 |
| CGL thickness, per 1 µm increase | 80 | 0.13 (-0.04 to 0.3) | 0.1 |
| VA, per 1 logMAR increase | 85 | -3.9 (-6.1 to -1.7) | 0.001 |
| Spherical equivalent, per 1 δ increase | 83 | 0.33 (-0.1 to 0.8) | 0.2 |
| Frisén score  not applicable (healthy)  1  2  3  4 | 85  19  34  25  6  1 | -  reference, mean VD 44.8  -1.3 (-3.4 to 0.9)  -0.5 (-2.8 to 1.8)  -4.1 (-7.3 to -0.8)  -7.3 (-14.3 to -0.4) | -  -  0.2  0.7  0.02  0.04 |
| Disc area, per 1 mm2 increase | 85 | -1.8 (-3.6 to -0.08) | 0.045 |
| SNR, per 1 dB increase | 85 | -0.08 (-0.2 to 0.1) | 0.2 |
| RPC: retinal peripapillary capillary network, VD: vascular density, CI: confidence interval, RNFL: retinal nerve fiber layer, CGL: cell ganglion layer, VA: visual acuity, SNR: signal noise ratio | | | |
