# Supplementary material
Source: Research Square preprint supplement (doi:10.21203/rs.3.rs-9202407/v1)
Supplement: Supplementary file 2 [file a3fbf391605e353d81858ce1.docx]

Table 2: Retinal peripapillary capillary network vascular density association with the other outcomes collected

|  | n | RPC VD mean difference, % (CI 95%) | p value |
| --- | --- | --- | --- |
| Age, per 1-year increase | 85 | -0.01 (-0.2 to 0.2) | 1 |
| Sex, female versus male | 85 | -0.7 (-2.4 to 1.1) | 0.5 |
| RNFL thickness, per 1 µm increase | 82 | -0.02 (-0.03 to -0.01) | <0.01 |
| CGL thickness, per 1 µm increase | 80 | 0.13 (-0.04 to 0.3) | 0.1 |
| VA, per 1 logMAR increase | 85 | -3.9 (-6.1 to -1.7) | 0.001 |
| Spherical equivalent, per 1 δ increase | 83 | 0.33 (-0.1 to 0.8) | 0.2 |
| Frisén score  not applicable (healthy)  1  2  3  4 | 85  19  34  25  6  1 | -  reference, mean VD 44.8  -1.3 (-3.4 to 0.9)  -0.5 (-2.8 to 1.8)  -4.1 (-7.3 to -0.8)  -7.3 (-14.3 to -0.4) | -  -  0.2  0.7  0.02  0.04 |
| Disc area, per 1 mm2 increase | 85 | -1.8 (-3.6 to -0.08) | 0.045 |
| SNR, per 1 dB increase | 85 | -0.08 (-0.2 to 0.1) | 0.2 |
| RPC: retinal peripapillary capillary network, VD: vascular density, CI: confidence interval, RNFL: retinal nerve fiber layer, CGL: cell ganglion layer, VA: visual acuity, SNR: signal noise ratio | | | |
